# Supplementary material for: Photoluminescent nanoparticles in water with tunable emission for coating and ink-jet printing
Source: Royal Society of Chemistry journal article supplement (doi:10.1039/c5tc00318k), 2015-01-01
Supplement: c5tc00318k1.pdf [file c5tc00318k1.pdf]

## Photoluminescent Nanoparticles in Water with Tunable Emission for Coating and Ink-Jet Printing

Chao Deng<sup>†</sup>, Zhening Yang<sup>†</sup>, Zhicheng Zheng<sup>‡</sup>, Na Liu<sup>†</sup>, Jun Ling<sup>†,\*</sup>

<sup>†</sup> MOE Key Laboratory of Macromolecular Synthesis and Functionalization,  
Department of Polymer Science and Engineering, Zhejiang University, Hangzhou  
310027, China

<sup>‡</sup> Hensenstraße 152, D-48161 Münster, Germany

\* Corresponding authors. Email: lingjun@zju.edu.cn

### Supporting information

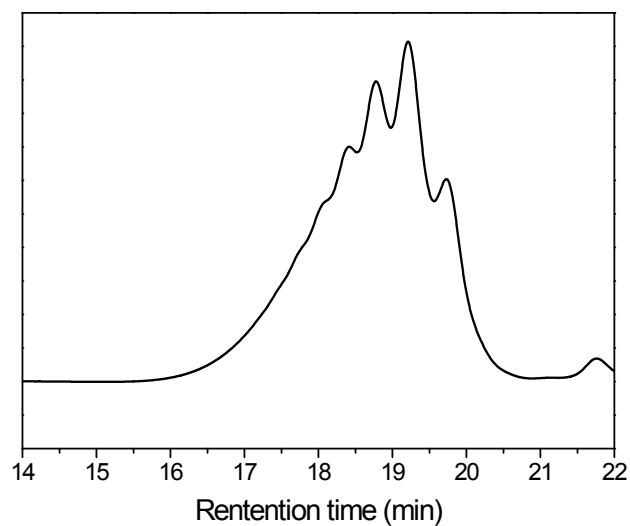

**Figure S1.** SEC trace of PFMA (THF as elution solvent)

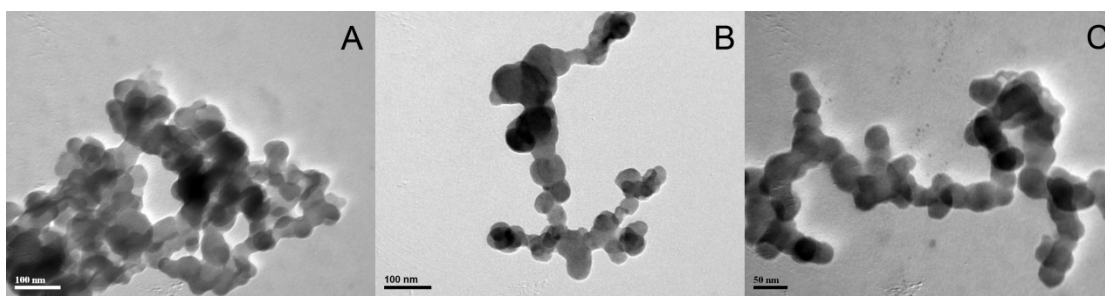

**Figure S2.** TEM images of PD1 (A), PD3 (B) and PD4 (C)

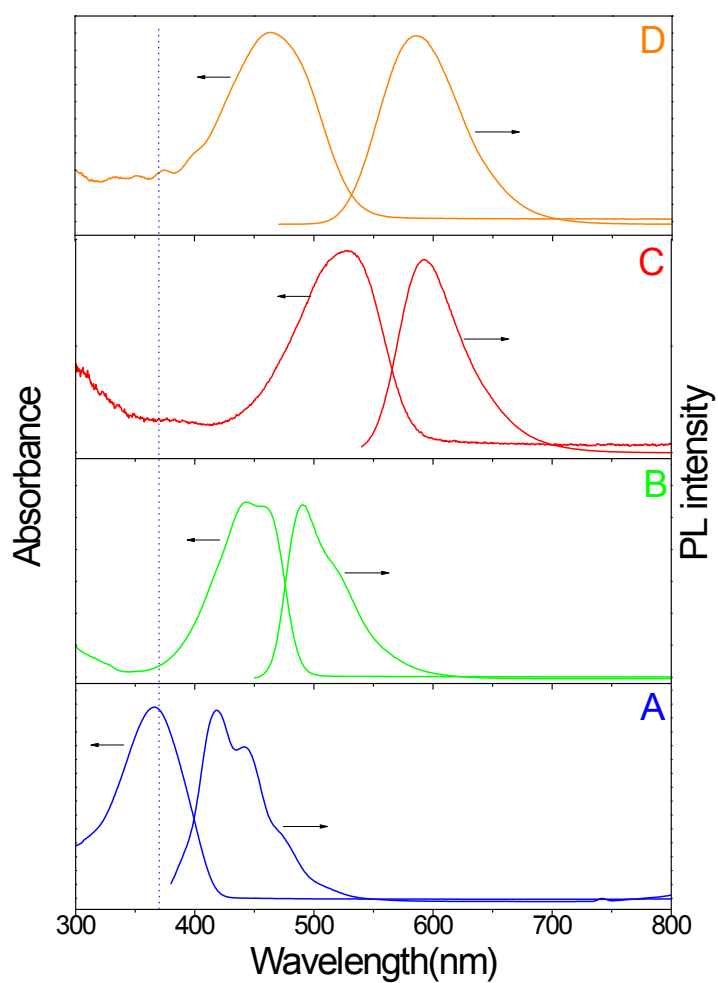

**Figure S3.** UV-Vis and photoluminescent spectra of PFMA (A), Coumadin 6 (B), Nile red (C) and DCM (D)

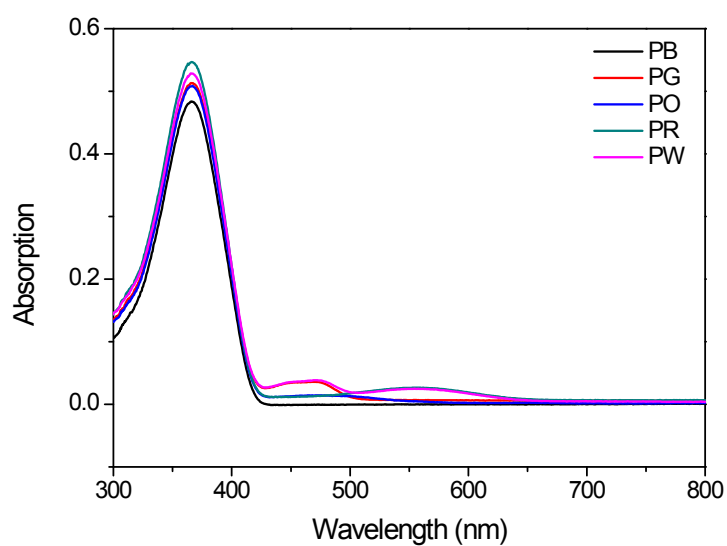

**Figure S4.** UV-Vis spectra of PB, PG, PO, PR and PW NPs

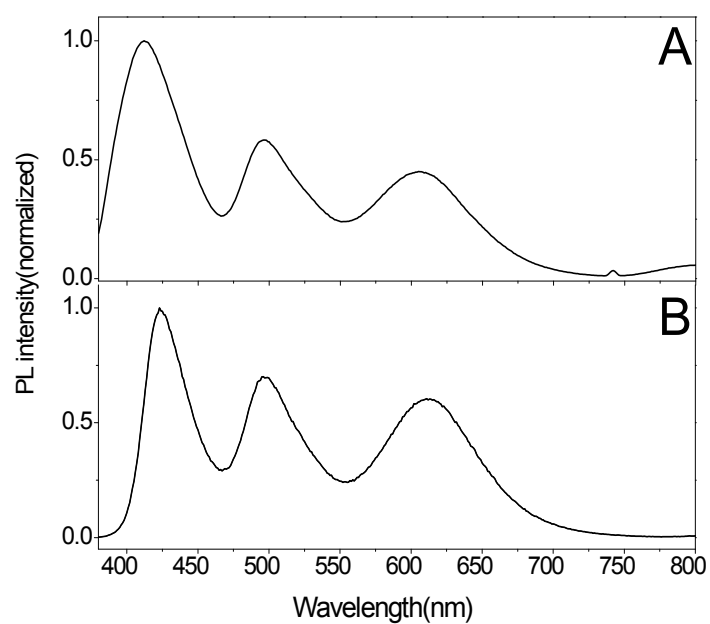

**Figure S5.** The stability study of PW NPs: (A) PL spectrum of PW obtained immediately after preparing; (B) PL spectrum of PW kept in the dark for three months.
